# Supplementary material for: Influence of planting yellowhorn (Xanthoceras sorbifolium Bunge) on the bacterial and fungal diversity of fly ash
Source: PeerJ journal article supplement (doi:10.7717/peerj.14015), 2022-09-23

**A**

Multi samples Shannon Curves

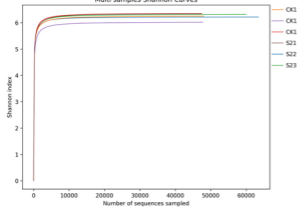**B**

Multi samples Shannon Curves

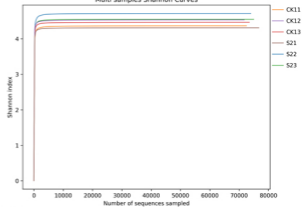**C**

Multi samples Rarefaction Curves

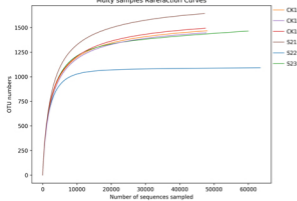**D**

Multi samples Rarefaction Curves

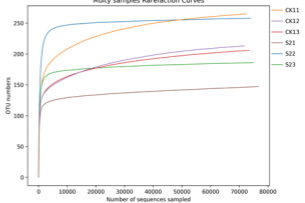**E**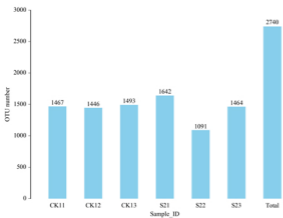**F**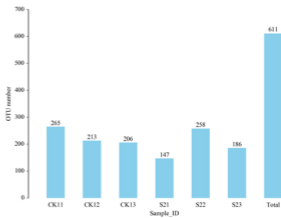

Supplement: S1_Fig_NEW.pdf [file S1_Fig_NEW.pdf]
