# Supplementary material for: Influence of planting yellowhorn (Xanthoceras sorbifolium Bunge) on the bacterial and fungal diversity of fly ash
Source: PeerJ journal article supplement (doi:10.7717/peerj.14015), 2022-09-23

**A**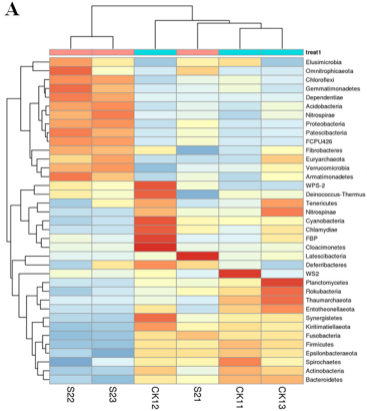**B**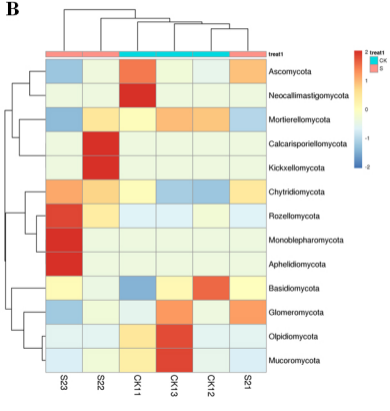

Supplement: S3_Fig_NEW.pdf [file S3_Fig_NEW.pdf]
